# Supplementary material
Source: PubMed Central journal article supplement (PMC1236582)
Supplement: pnas_0506768102_1.pdf [file pnas_0506768102_1.pdf]

**Table 10. Age and sex characteristics of the study population**

|               | <b>Number of<br/>volunteers</b> | <b>Average<br/>age <math>\pm</math> SD</b> |
|---------------|---------------------------------|--------------------------------------------|
| <b>Male</b>   | 18                              | 35 ( $\pm$ 9)                              |
| <b>Female</b> | 40                              | 43 ( $\pm$ 11)                             |
| <b>Total</b>  | 58                              | 41 ( $\pm$ 11)                             |

Ethnic breakdown of the study population was 86% Caucasian, 5.3% Hispanic, 3.5% African-American, 3.5% Asian, 1.7% American-Indian.
