# Supplementary material
Source: PubMed Central journal article supplement (PMC1236582)
Supplement: pnas_0506768102_2.pdf [file pnas_0506768102_2.pdf]

**Table 11. Frequency of HLA supertypes in a study population and number of potential epitopes tested**

| <b>HLA-supertype</b> | <b>Observed in the study population, %</b> | <b>Worldwide predicted frequency, %</b> | <b>Number of peptides tested</b> |
|----------------------|--------------------------------------------|-----------------------------------------|----------------------------------|
| A1                   | 37.9                                       | 25.2                                    | 836                              |
| A2                   | 46.6                                       | 42.2                                    | 964                              |
| A3                   | 53.4                                       | 44.2                                    | 1,584                            |
| A24                  | 20.7                                       | 40                                      | 1,177                            |
| B7                   | 62.1                                       | 49.5                                    | 341                              |
| B44                  | 39.7                                       | 37                                      | 1,153                            |
| Total                | 100%                                       | 99.3%                                   | 6,055                            |

HLA Supertypes were defined as encompassing the following alleles:

**A1:** A\*0101, A\*2501, A\*2601, A\*2602, A\*2902, A\*3002

**A2:** A\*0201, A\*0202, A\*0203, A\*0204, A\*0205, A\*0206, A\*0207, A\*0209, A\*0214, A\*6802, A\*6901

**A3:** A\*0301, A\*1101, A\*3101, A\*3301, A\*6801, A\*7401

**A24:** A\*2301, A\*2402

**B7:** B\*0702, B\*0703, B\*0704, B\*0705, B\*1508, B\*3501, B\*3502, B\*3503, B\*3504, B\*3505, B\*3506, B\*3507, B\*3508, , B\*4201, B\*5101, B\*5102, B\*5103, B\*5104, B\*5105, B\*5301, B\*5401, B\*5501, B\*5502, B\*5601, B\*5602, B\*6701, B\*7801

**B44:** B\*1801, B\*1802, B\*3701, B\*4402, B\*4403, B\*4404, B\*4001, B\*4002, B\*4006, B\*4501
