# Supplementary material
Source: PubMed Central journal article supplement (PMC1236582)
Supplement: pnas_0506768102_3.pdf [file pnas_0506768102_3.pdf]

**Table 12. HLA A1 supertype binding vaccinia-derived T cell epitopes**

| Epitopes        | Sequence   | ORF | A1-supertype binding capacity (IC50 nM) <sup>1</sup> |           |             |             |
|-----------------|------------|-----|------------------------------------------------------|-----------|-------------|-------------|
|                 |            |     | A*0101                                               | A*2601    | A*2902      | A*3002      |
| D1R (156-164)   | FTIDFKLKY  | 42  | 60                                                   | <b>21</b> | <b>1.4</b>  | 1048        |
| B8R(139-147)    | DMCDIYLLY  | 98  | <b>28</b>                                            | <b>82</b> | <b>89</b>   | 55          |
| B8R(153-162)    | FGDSKEPVPY | 98  | <b>137</b>                                           | 5679      | <b>564</b>  | 8171        |
| B8R(262-271)    | FLSMLNLTKY | 98  | <b>267</b>                                           | 7830      | <b>154</b>  | 500         |
| C10L(297-305)   | SQSDTVFDY  | 113 | 3022                                                 | 1856      | 844         | <b>2.3</b>  |
| C10L(298-306)   | QSDTVFDYY  | 113 | <b>1.0</b>                                           | -         | -           | 2950        |
| C19L(29-38)     | VSVNNVCHMY | 114 | 130                                                  | 4257      | <b>1079</b> | 3.7         |
| C19L(104-112)   | QSITRSLIY  | 114 | 74                                                   | 4985      | <b>295</b>  | 291         |
| C12L(97-106)    | VTDTNKFDNY | 125 | <b>1.6</b>                                           | -         | -           | <b>256</b>  |
| D12L(11-19)     | GTHVLLPFY  | 196 | 609                                                  | 4337      | 5426        | <b>0.58</b> |
| VWR050(259-267) | CMLTEFLHY  | 260 | 555                                                  | -         | <b>0.54</b> | 14          |

1. High affinity binding (IC50s ≤500 nM) is highlighted by bold font. A dash (-) indicates IC50 >50000 nM.
