# Supplementary material
Source: PubMed Central journal article supplement (PMC1236582)
Supplement: pnas_0506768102_4.pdf [file pnas_0506768102_4.pdf]

**Table 13. HLA A2 supertype binding vaccinia-derived T cell epitopes**

| Epitopes      | Sequence   | ORF | A2-supertype binding capacity (IC50 nM) <sup>1</sup> |        |        |        |        |
|---------------|------------|-----|------------------------------------------------------|--------|--------|--------|--------|
|               |            |     | A*0201                                               | A*0202 | A*0203 | A*0206 | A*6802 |
| E9L(107-115)  | FLNISWFYI  | 170 | <b>0.0016</b>                                        | 0.17   | 0.33   | 1.0    | 240    |
| F12L(404-412) | FLTSVINRV  | 158 | <b>4.0</b>                                           | 0.11   | 1.4    | 4.8    | 0.42   |
| D3R(342-350)  | FLVIAINAM  | 205 | <b>435</b>                                           | 5.9    | 33     | 930    | 19868  |
| O1L(247-255)  | GLNDYLHSV  | 172 | <b>1.3</b>                                           | 0.74   | 1.4    | 3.9    | 2664   |
| VWR082(18-26) | ILDDNLYKV  | 254 | <b>2.2</b>                                           | 4.5    | 61     | 8.9    | 48270  |
| A6L(172-180)  | ILSDENYLL  | 204 | <b>0.47</b>                                          | 0.31   | 9.0    | 11     | 5787   |
| E2L(249-257)  | KIDYYIPYV  | 165 | <b>0.32</b>                                          | 47     | 146    | 1.1    | 29042  |
| C7L(74-82)    | KVDDTFYV   | 131 | <b>4.2</b>                                           | 3.3    | 179    | 1.3    | 1139   |
| A36R(1-9)     | MMLVPLITV  | 74  | <b>0.12</b>                                          | 9.0    | 2.6    | 0.12   | 13     |
| F12L(286-295) | NLFDIPLLTV | 158 | <b>0.25</b>                                          | 0.10   | 0.25   | 1.5    | 8.1    |
| I4L(720-128)  | SMHFYGWSL  | 177 | <b>226</b>                                           | 13     | 173    | 2035   | 20690  |
| A55R(78-86)   | YIYGIPLSL  | 89  | <b>3.5</b>                                           | 4.9    | 3.7    | 4.1    | 329    |
| A26L(177-186) | YLYTEYFLFL | 219 | <b>0.069</b>                                         | 0.085  | 0.56   | 0.0070 | 76     |
| N2L(93-101)   | YVNAILYQI  | 139 | <b>37</b>                                            | 0.15   | 22     | 20     | 0.34   |

1. High affinity binding (IC50s ≤500 nM) is highlighted by bold font. A dash (-) indicates IC50 >50000 nM.
