# Supplementary material
Source: PubMed Central journal article supplement (PMC1236582)
Supplement: pnas_0506768102_5.pdf [file pnas_0506768102_5.pdf]

**Table 14. HLA A3 supertype binding vaccinia-derived T cell epitopes**

| Epitope      | Sequence   | ORF | A3-supertype binding capacity (IC50 nM) <sup>1</sup> |            |        |            |        |
|--------------|------------|-----|------------------------------------------------------|------------|--------|------------|--------|
|              |            |     | A*0301                                               | A*1101     | A*3101 | A*3301     | A*6801 |
| G8R(65-73)   | IVFNLPVSK  | 29  | <b>2.2</b>                                           | 4.6        | 23     | 3174       | 5.4    |
| J6R(332-340) | NQVKFYFNK  | 37  | <b>192</b>                                           | 2.2        | 15     | 822        | 5.8    |
| D1R(152-161) | KTKNFTIDFK | 42  | <b>11</b>                                            | 22         | 14     | 40360      | 144    |
| A8R(79-88)   | AVKDVTITKK | 57  | <b>84</b>                                            | 519        | 605    | -          | 1617   |
| A31R(87-94)  | VTSSGAIYK  | 69  | 10                                                   | <b>3.1</b> | 3969   | 21351      | 24     |
| B5R(154-163) | GTIAGGVCYY | 96  | 132                                                  | <b>4.5</b> | 8452   | 38629      | 11061  |
| B14R(74-83)  | AVFKDSFLRK | 103 | 8.2                                                  | <b>121</b> | 686    | 42365      | 47     |
| C12L(93-102) | KVLHVTDTNK | 125 | <b>8.1</b>                                           | 10         | 466    | -          | 3025   |
| C9L(193-201) | ATSLDVINY  | 129 | 625                                                  | <b>6.8</b> | 10282  | -          | -      |
| C7L(31-40)   | KLKIISNDYK | 131 | <b>4.5</b>                                           | 464        | 137    | -          | -      |
| C5L(158-166) | KVMFVIRFK  | 133 | <b>1.4</b>                                           | <b>7.3</b> | 4.9    | 857        | 30     |
| I3L(116-124) | AVYGNIKHK  | 176 | <b>9.4</b>                                           | 18         | 12     | 7169       | 76     |
| D5R(670-678) | YLLVKWYRK  | 46  | 5.6                                                  | 3.6        | 45     | <b>114</b> | -      |

1. High affinity binding (IC50s  $\leq$ 500 nM) is highlighted by bold font. A dash (-) indicates IC50 >50000 nM.
