# Supplementary material
Source: PubMed Central journal article supplement (PMC1236582)
Supplement: pnas_0506768102_6.pdf [file pnas_0506768102_6.pdf]

**Table 15. HLA A24 supertype binding vaccinia-derived T cell epitopes**

| Epitope      | Sequence   | ORF | A24-supertype binding (IC50 nM) <sup>1</sup> |            |            |
|--------------|------------|-----|----------------------------------------------|------------|------------|
|              |            |     | A*2301                                       | A*2402     | A*2902     |
| D5R(349-357) | VWINNSWKF  | 46  | <b>5.3</b>                                   | <b>6.4</b> | <b>4.9</b> |
| D5R(663-672) | RYRFAFLYLL | 46  | 41                                           | <b>166</b> | 16216      |
| C6L(54-63)   | RYYDGNIYEL | 132 | 1.0                                          | <b>9.6</b> | 16978      |

1. High affinity binding (IC50s  $\leq$ 500 nM) is highlighted by bold font. A dash (-) indicates IC50 >50000 nM.
