# Supplementary material
Source: PubMed Central journal article supplement (PMC1236582)
Supplement: pnas_0506768102_7.pdf [file pnas_0506768102_7.pdf]

**Table 16. HLA B7 supertype binding vaccinia-derived T cell epitopes**

| Epitope      | Sequence   | ORF | B7-supertype binding capacity (IC50 nM) <sup>1</sup> |        |        |        |        |
|--------------|------------|-----|------------------------------------------------------|--------|--------|--------|--------|
|              |            |     | B*0702                                               | B*3501 | B*5101 | B*5301 | B*5401 |
| C1L(102-111) | KPKPAVRFAI | 137 | <b>0.18</b>                                          | 36300  | -      | 20500  | 680    |
| D1R(686-694) | HPRHYATVM  | 42  | <b>0.87</b>                                          | 63     | 14742  | 3065   | 4378   |
| J6R(303-311) | MPAYIRNTL  | 37  | <b>0.53</b>                                          | 19     | 461    | 49     | 3.4    |
| O1L(335-344) | RPMSLRSTII | 172 | <b>0.43</b>                                          | 45889  | 9623   | 1230   | 265    |
| F4L(6-14)    | APNPNRFVI  | 151 | <b>1.4</b>                                           | 1201   | 4721   | 75     | 97     |

1. High affinity binding (IC50s  $\leq$ 500 nM) is highlighted by bold font. A dash (-) indicates IC50 >50000 nM.
