# Supplementary material
Source: PubMed Central journal article supplement (PMC1236582)
Supplement: pnas_0506768102_8.pdf [file pnas_0506768102_8.pdf]

**Table 17. HLA B44 supertype binding vaccinia-derived T cell epitopes**

| Epitope      | Sequence  | ORF | B44-supertype binding capacity (IC50 nM) <sup>1</sup> |            |        |        |        |        |
|--------------|-----------|-----|-------------------------------------------------------|------------|--------|--------|--------|--------|
|              |           |     | B*1801                                                | B*4001     | B*4002 | B*4402 | B*4403 | B*4501 |
| B8R(110-118) | TEYDDHINL | 98  | 645                                                   | <b>7.5</b> | 108    | 913    | 1200   | 7792   |
| C3L(120-128) | GESKSYCEL | 135 | 6193                                                  | <b>2.1</b> | 27     | 182    | 3815   | 607    |
| G2R(181-189) | DELVDPINY | 26  | 16                                                    | 529        | 13251  | 14319  | 2670   | 12408  |

1. High affinity binding (IC50s  $\leq$ 500 nM) is highlighted by bold font. A dash (-) indicates IC50 >50000 nM.
