# Supplementary material
Source: PubMed Central journal article supplement (PMC1236582)
Supplement: pnas_0506768102_9.pdf [file pnas_0506768102_9.pdf]

**Table 18. Structural and phylogenetic characteristics of VACV-WR immunogenic antigens**

| VAC-WR Number | Antigen Name | Protein size | Time of expression | Description                                                                           | Function category | Epitopes        | Restriction Element            | Percent Homology with VAR-major | Percent Homology with MVA                 |
|---------------|--------------|--------------|--------------------|---------------------------------------------------------------------------------------|-------------------|-----------------|--------------------------------|---------------------------------|-------------------------------------------|
| 008/211       | C19L         | 112          | -                  | ankyrin-like                                                                          | -                 | C19L(29-38)     | A*2601, A*2902                 | 100(G3R)                        | ≤50                                       |
|               |              |              |                    |                                                                                       |                   | C19L(104-112)   |                                | 55.6(B24R, B16L, B6R)           | 55.6 (MVA135R)                            |
| 010/209       | C10L         | 331          | -                  | -                                                                                     | -                 | C10L(298-306)   | A*0101, A*3002                 | 88.9(D3L)                       | 100 (MVA006L)                             |
|               |              |              |                    |                                                                                       |                   | C10L(297-305)   |                                | 88.9(D3L)                       | 100 (MVA006L)                             |
| 013           | C12L         | 126          | -                  | interleukin-18-binding protein; host defense modulator                                | Virulence Factor  | C12L(97-106)    | A*0101, A*3002                 | 80(D5L)                         | 80 (MVA008L)                              |
|               |              |              |                    |                                                                                       |                   | C12L(93-102)    | A*0301                         | 100(D5L)                        | 100 (MVA008L)                             |
| 019           | C9L          | 634          | -                  | ankyrin-like                                                                          | -                 | C9L(193-201)    | A*1101                         | 55.6(A10L, A24R, H5R, N3L, Q1L) | 55.6 (MVA074R)                            |
| 021           | C7L          | 150          | early              | host-range; possible host defense modulator,                                          | Virulence Factor  | C7L(31-40)      | A*0301                         | 100(D8L)                        | 100 (MVA018L)                             |
|               |              |              |                    |                                                                                       |                   | C7L(74-82)      | A*0201 (Terajima et al., 2003) | 100(D11L)                       | 100 (MVA018L)                             |
| 022           | C6L          | 151          | -                  | -                                                                                     | -                 | C6L(54-63)      | A*2407                         | 90 (D9L)                        | 90 (MVA019L)                              |
| 023           | C5L          | 204          | -                  | -                                                                                     | -                 | C5L(158-166)    | A*1101, A*0301                 | 55.6(I6R, A6L)                  | 55.6 (MVA096R)                            |
| 025           | C3L          | 263          | early              | complement control protein, host defense modulator                                    | Virulence Factor  | C3L(120-128)    | B*4001                         | 77.8(D12L)                      | 55.6 (MVA069R)                            |
| 027           | C1L          | 229          | -                  | -                                                                                     | -                 | C1L(102-111)    | B*0702                         | 90 (D14L)                       | ≤50                                       |
| 029           | N2L          | 175          | early              | alpha-amanitin target                                                                 | -                 | N2L(93-101)     | A*0201                         | 100(P2L)                        | 100 (MVA021L)                             |
| 043           | F4L          | 319          | early              | ribonucleoside-diphosphate reductase                                                  | viral regulation  | F4L(6-14)       | B*0702                         | 88.9(C8L)                       | 100 (MVA032L)                             |
| 050           | -            | 348          | -                  | -                                                                                     | -                 | VWR050(259-267) | A*2601, A*2902                 | 100(C15L)                       | 55.6 (MVA068L)                            |
| 051           | F12L         | 635          | late               | involved in plaque and EEV formation                                                  | -                 | F12L(404-413)   | A*0201                         | 100(C16L)                       | 100 (MVA042L)                             |
|               |              |              |                    |                                                                                       |                   | F12L(286-295)   | A*0201                         | 100(C16L)                       | 100 (MVA042L)                             |
| 058           | E2L          | 737          | -                  | -                                                                                     | -                 | E2L(249-257)    | A*0201                         | 100(E2L)                        | 100 (MVA049L)                             |
| 065           | E9L          | 1006         | early              | DNA polymerase                                                                        | viral regulation  | E9L(107-115)    | A*0201                         | 100(E9L)                        | 100 (MVA156L)                             |
| 068           | O1L          | 666          | -                  | -                                                                                     | -                 | O1L(247-255)    | A*0201                         | 100(Q1L)                        | 55.6 (MVA075R)                            |
|               |              |              |                    |                                                                                       |                   | O1L(335-344)    | B*0702                         | 100(Q1L)                        | 60 (MVA053R)                              |
| 072           | I3L          | 269          | early              | ssDNA-binding phosphoprotein subunit                                                  | viral regulation  | I3L(116-124)    | A*0301                         | 100(K3L)                        | 100 (MVA064L)                             |
| 073           | I4L          | 771          | early              | ribonucleotide reductase large subunit                                                | viral regulation  | I4L(720-128)    | A*0201                         | 100(K4L)                        | 100 (MVA065L)                             |
| 080           | G2R          | 220          | early              | late transcription elongation factor                                                  | viral regulation  | G2R(181-189)    | B*3701                         | 88.9(H3R)                       | 100(MVA072R)                              |
| 082           | -            | 434          | -                  | -                                                                                     | -                 | VWR082(18-26)   | A*0201                         | 100(H5R)                        | 100 (MVA074R)                             |
| 086           | G8R          | 260          | intermediate       | late gene transcription                                                               | viral regulation  | G8R(65-73)      | A*0301                         | 100(H8R)                        | 100 (MVA078R)                             |
| 098           | J6R          | 1286         | early              | DNA-dependent RNA polymerase subunit                                                  | viral regulation  | J6R(332-340)    | A*0301                         | 100(L6R)                        | 100 (MVA090R)                             |
|               |              |              |                    |                                                                                       |                   | J6R(303-311)    | B*0702                         | 100(L6R)                        | 100 (MVA090R)                             |
| 106           | D1R          | 844          | early              | large subunit of mRNA capping enzyme; transcription termination factor VTF            | viral regulation  | D1R(686-694)    | B*0702                         | 88.9(F1R)                       | 100 (MVA098R)                             |
|               |              |              |                    |                                                                                       |                   | D1R(156-164)    | A*2601, A*2902                 | 100(F1R)                        | 100 (MVA098R)                             |
|               |              |              |                    |                                                                                       |                   | D1R(152-161)    | A*0301                         | 100(F1R)                        | 100 (MVA098R)                             |
| 110           | D5R          | 785          | early              | NTPase interacts with A20R; essential for DNA replication                             | viral regulation  | D5R(670-678)    | A*3303                         | 100(F5R)                        | 88.9 (MVA102R)                            |
|               |              |              |                    |                                                                                       |                   | D5R(663-672)    | A*2402                         | 100(F5R)                        | 100 (MVA102R)                             |
|               |              |              |                    |                                                                                       |                   | D5R(349-357)    | A*2402                         | 100(F5R)                        | 100 (MVA102R)                             |
| 117           | D12L         | 287          | early              | small subunit of mRNA capping enzyme; transcription termination factor VTF            | viral regulation  | D12L(11-19)     | A*0101, A*3002                 | 100(N2L)                        | 100 (MVA109L)                             |
| 125           | A6L          | 372          | -                  | -                                                                                     | -                 | A6L(172-180)    | A*0201                         | 100(A6L)                        | 100 (MVA117L)                             |
| 126           | D3R          | 710          | late               | 82kDa large subunit of early gene transcription factor VETF                           | viral regulation  | D3R(342-350)    | A*0201                         | 100(A7L)                        | 100 (MVA118L)                             |
| 127           | A8R          | 288          | early              | small subunit of transcription factor VITF-3 used for intermediate gene expression    | viral regulation  | A8R(79-88)      | A*0301                         | 100(A8R)                        | 100 (MVA119R)                             |
| 148           | A26L         | 725          | -                  | gene fragment, cowpox A-type inclusion protein                                        | -                 | A26L(177-186)   | A*0201                         | 100(A28L)                       | ≤50                                       |
| 154           | A31R         | 124          | -                  | -                                                                                     | -                 | A31R(86-94)     | A*1101                         | 88.9(A34R)                      | 88.9 (MVA142R)                            |
| 159           | A36R         | 221          | late               | IEV transmembrane phosphoprotein interacts with A33R and used in actin tail formation | virion structure  | A36R(1-9)       | A*0201                         | 88.9(A39R)                      | 100 (MVA147R)                             |
| 180           | A55R         | 564          | -                  | kelch-like                                                                            | -                 | A55R(78-86)     | A*0201                         | 55.6(B26R)                      | 55.6 (MVA129R)                            |
| 188           | B5R          | 173          | late               | ankyrin-like                                                                          | -                 | B5R(154-163)    | A*1101                         | ≤50                             | 100 (MVA174R)                             |
| 190           | B8R          | 272          | early              | soluble interferon-gamma receptor like; host defense modulator                        | Virulence Factor  | B8R(139_147)    | A*0101, A*2601, A*2902         | 100(B9R)                        | 55.6 (MVA053R)                            |
|               |              |              |                    |                                                                                       |                   | B8R(153-162)    | A*0101, A*2601, A*2902         | 80(B9R)                         | ≤50                                       |
|               |              |              |                    |                                                                                       |                   | B8R(110-118)    | B*4001                         | 88.9(B9R)                       | 55.6 (MVA090R, MVA166R, MVA102R, MVA049L) |
|               |              |              |                    |                                                                                       |                   | B8R(262-271)    | A*0101, A*2902                 | ≤50                             | ≤50                                       |
| 195           | B14R         | 345          | early              | SPI-2/CrmA inhibits Fas-mediated apoptosis, IL-1 convertase, lipoxygenase pathway     | Virulence Factor  | B14R(74-83)     | A*1101                         | 80(B13R)                        | ≤50                                       |
